# Supplementary material for: Pan-Cancer Analysis of the Mitophagy-Related Protein PINK1 as a Biomarker for the Immunological and Prognostic Role
Source: PubMed Central journal article supplement (PMC7683787; doi:10.3389/fonc.2020.569887), 2020-11-10
Supplement: DataSheet_1.pdf [file DataSheet_1.pdf]

## Supplementary Material

### 1 Supplementary Figures and Tables

#### 1.1 Supplementary Figures

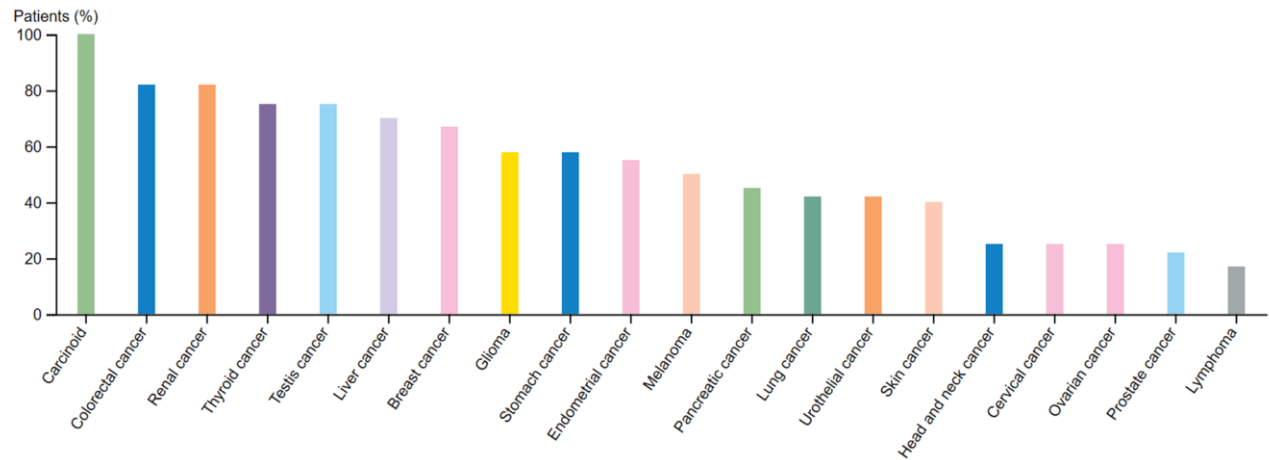

**Supplementary Figure 1.** Pan-cancer analysis of PINK1 protein expression level across cancers in the Human Protein Atlas.

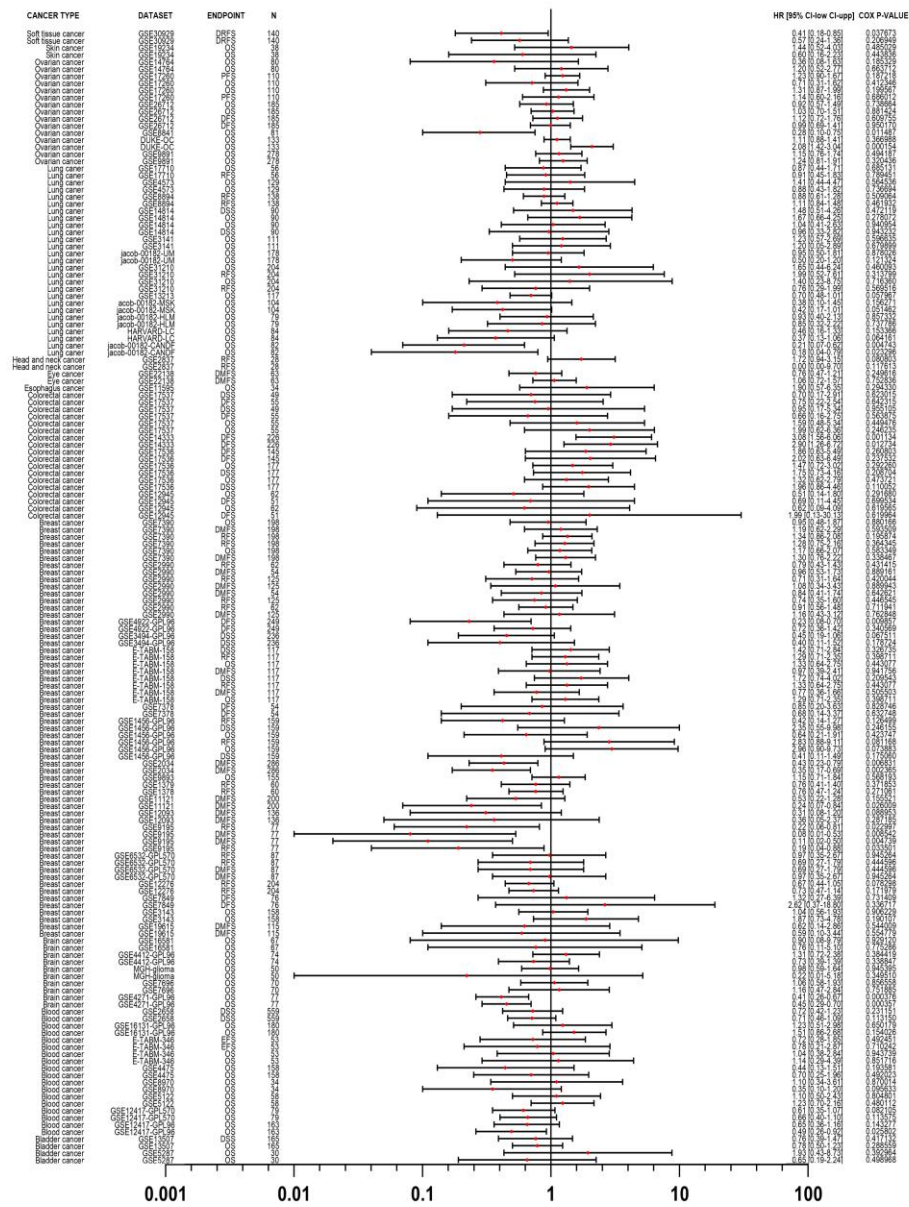

**Supplementary Figure 2.** Pan-cancer prognostic analysis of PINK1 expression in different datasets of cancers in PrognScan. The red circle represents hazard ratio. Abbreviations: OS, overall survival;

DSS, disease specific survival; EFS, event free survival; DMFS, distant metastasis free survival; RFS, relapse free survival; DFS, disease free survival; DRFS, distant recurrence free survival.

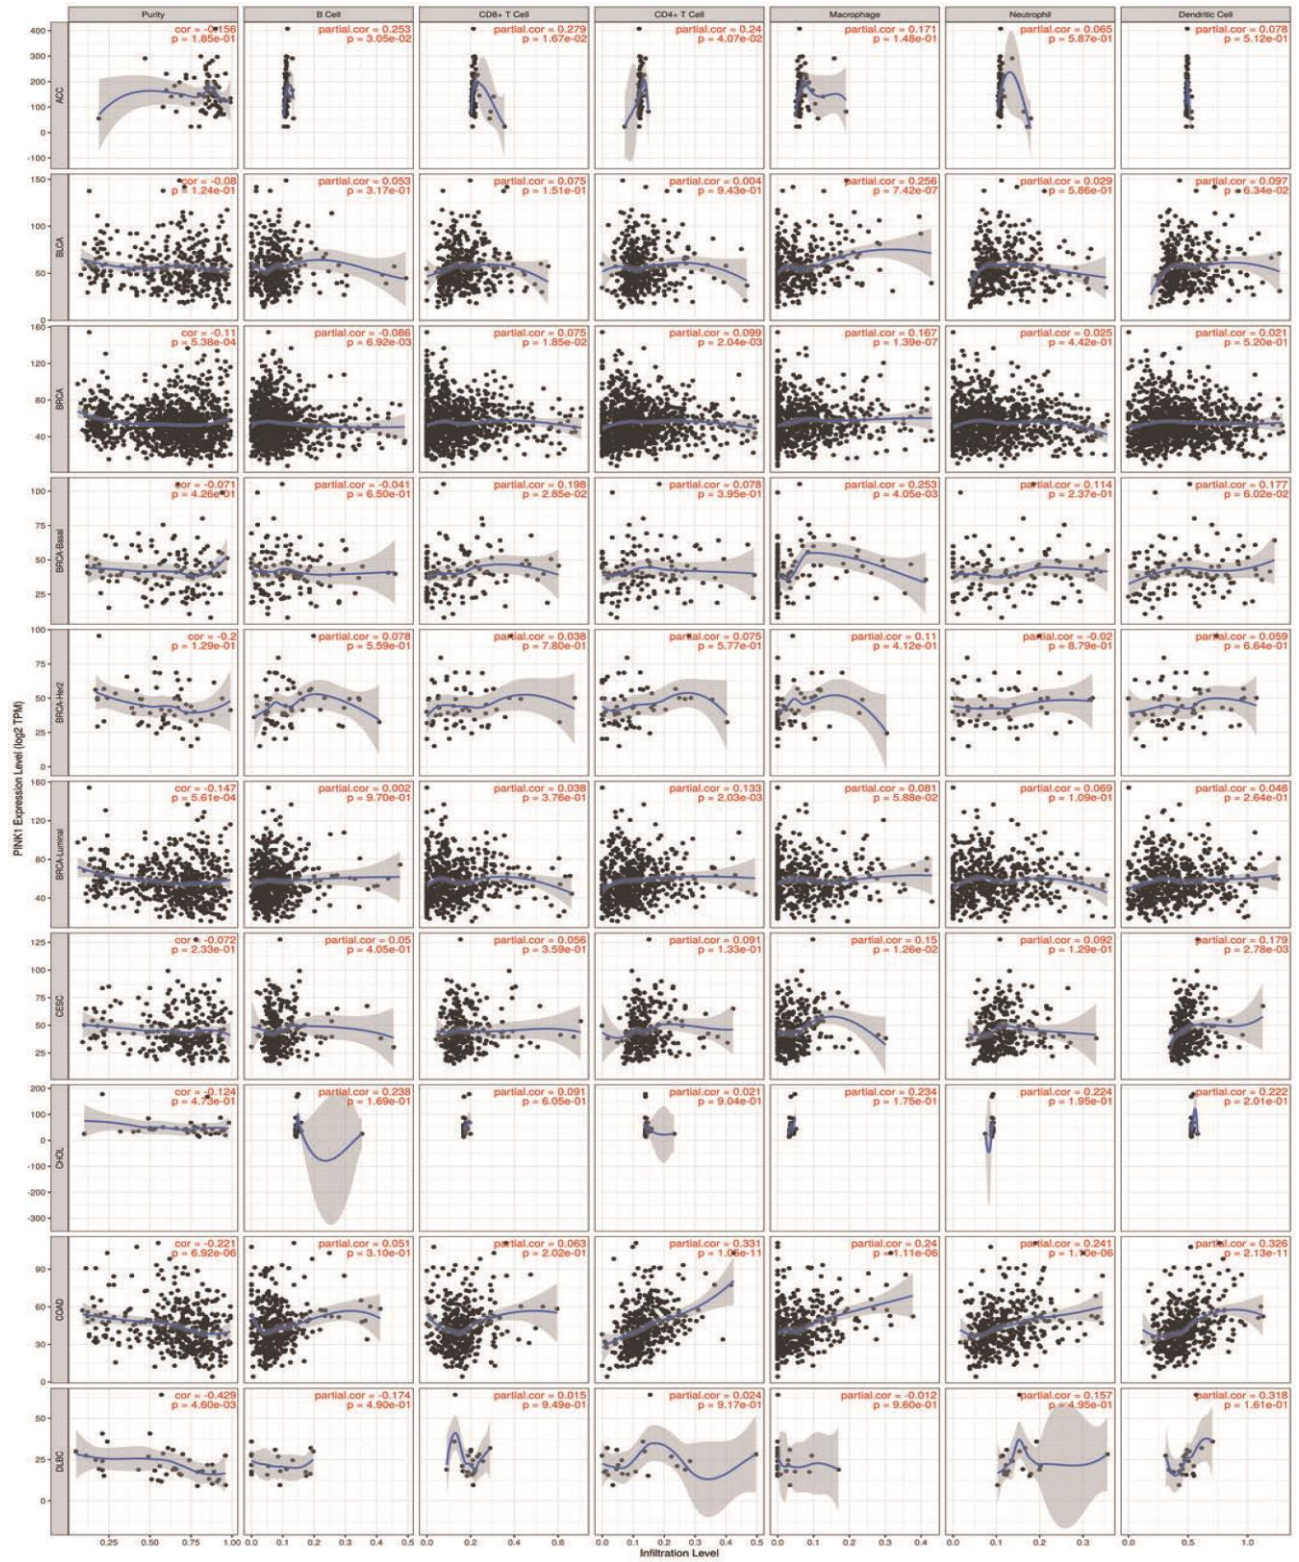

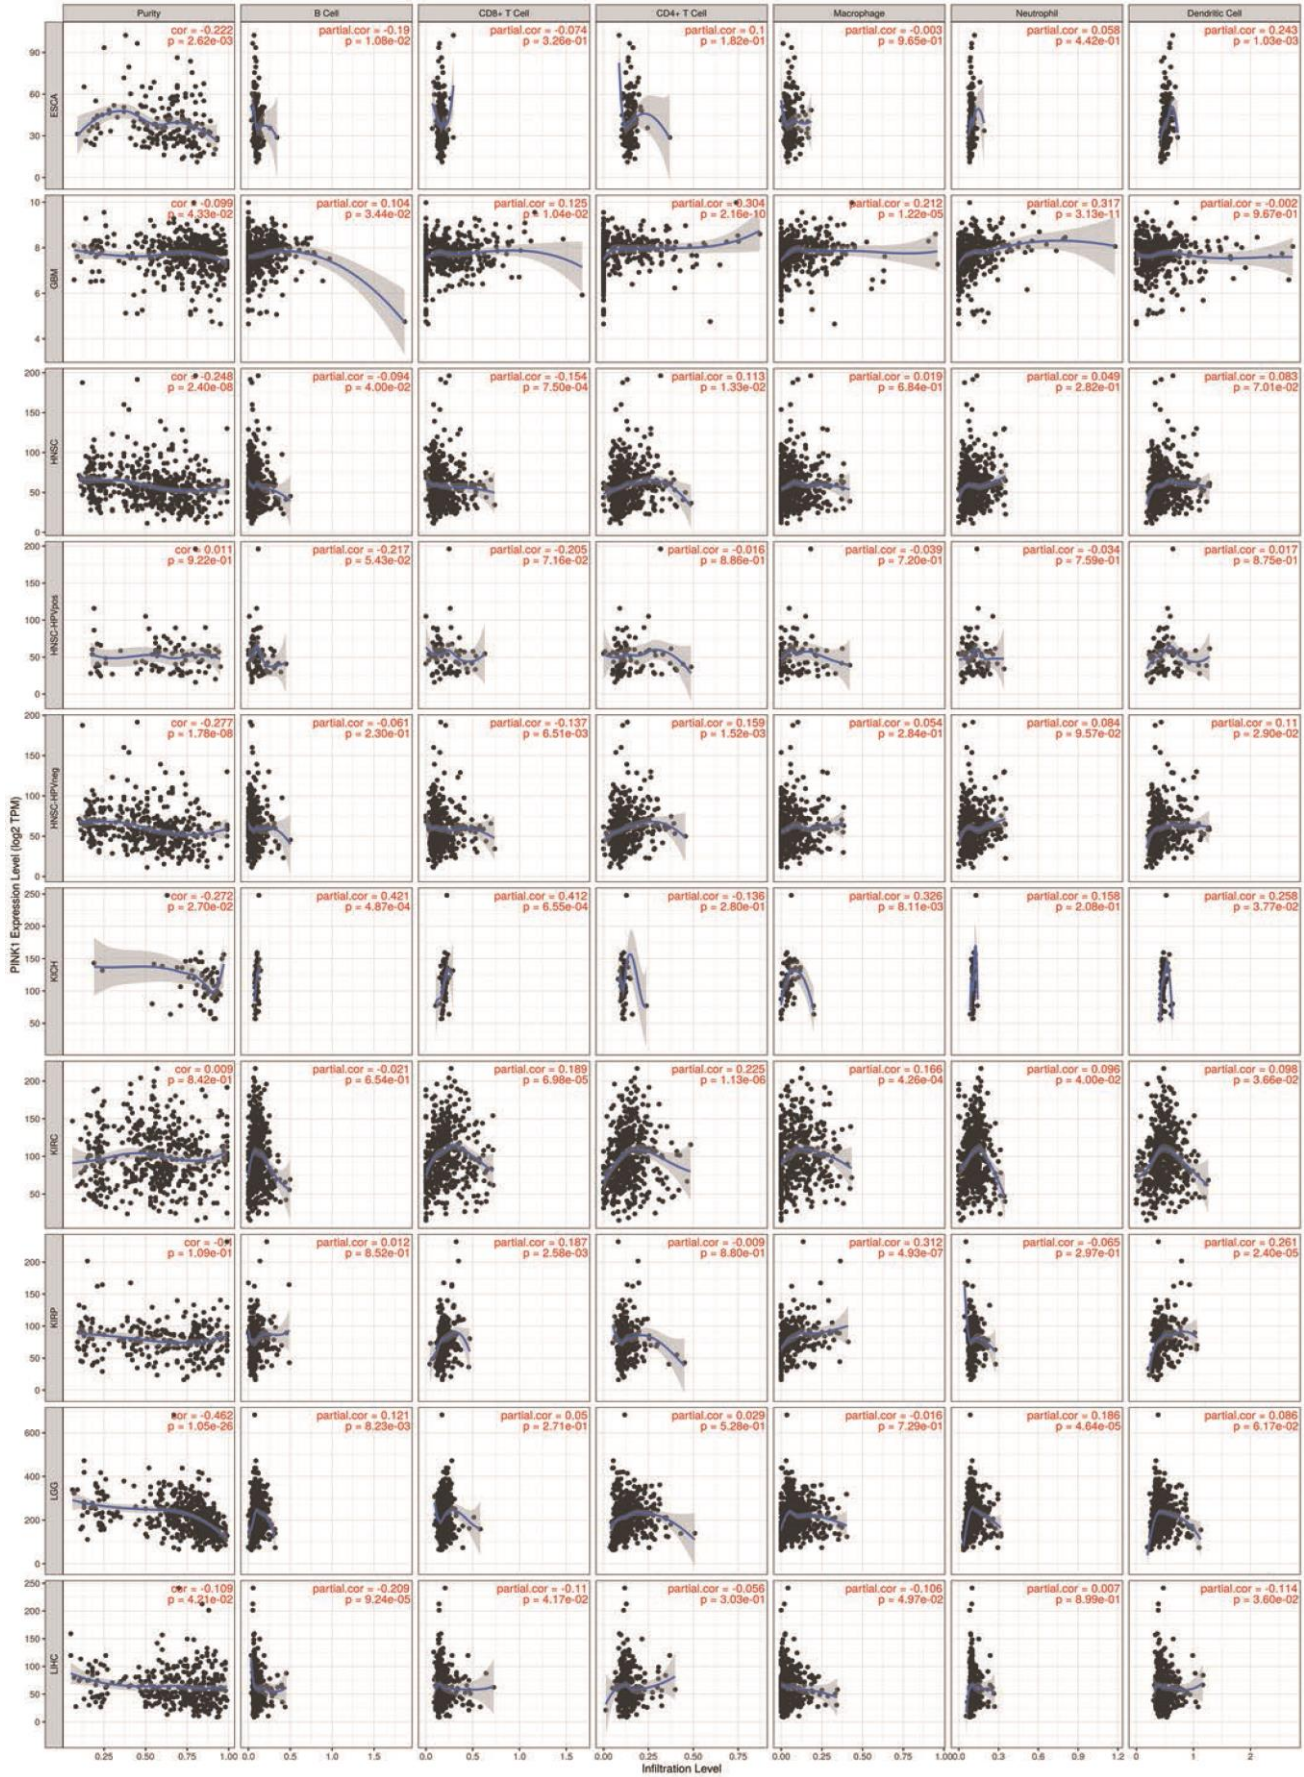

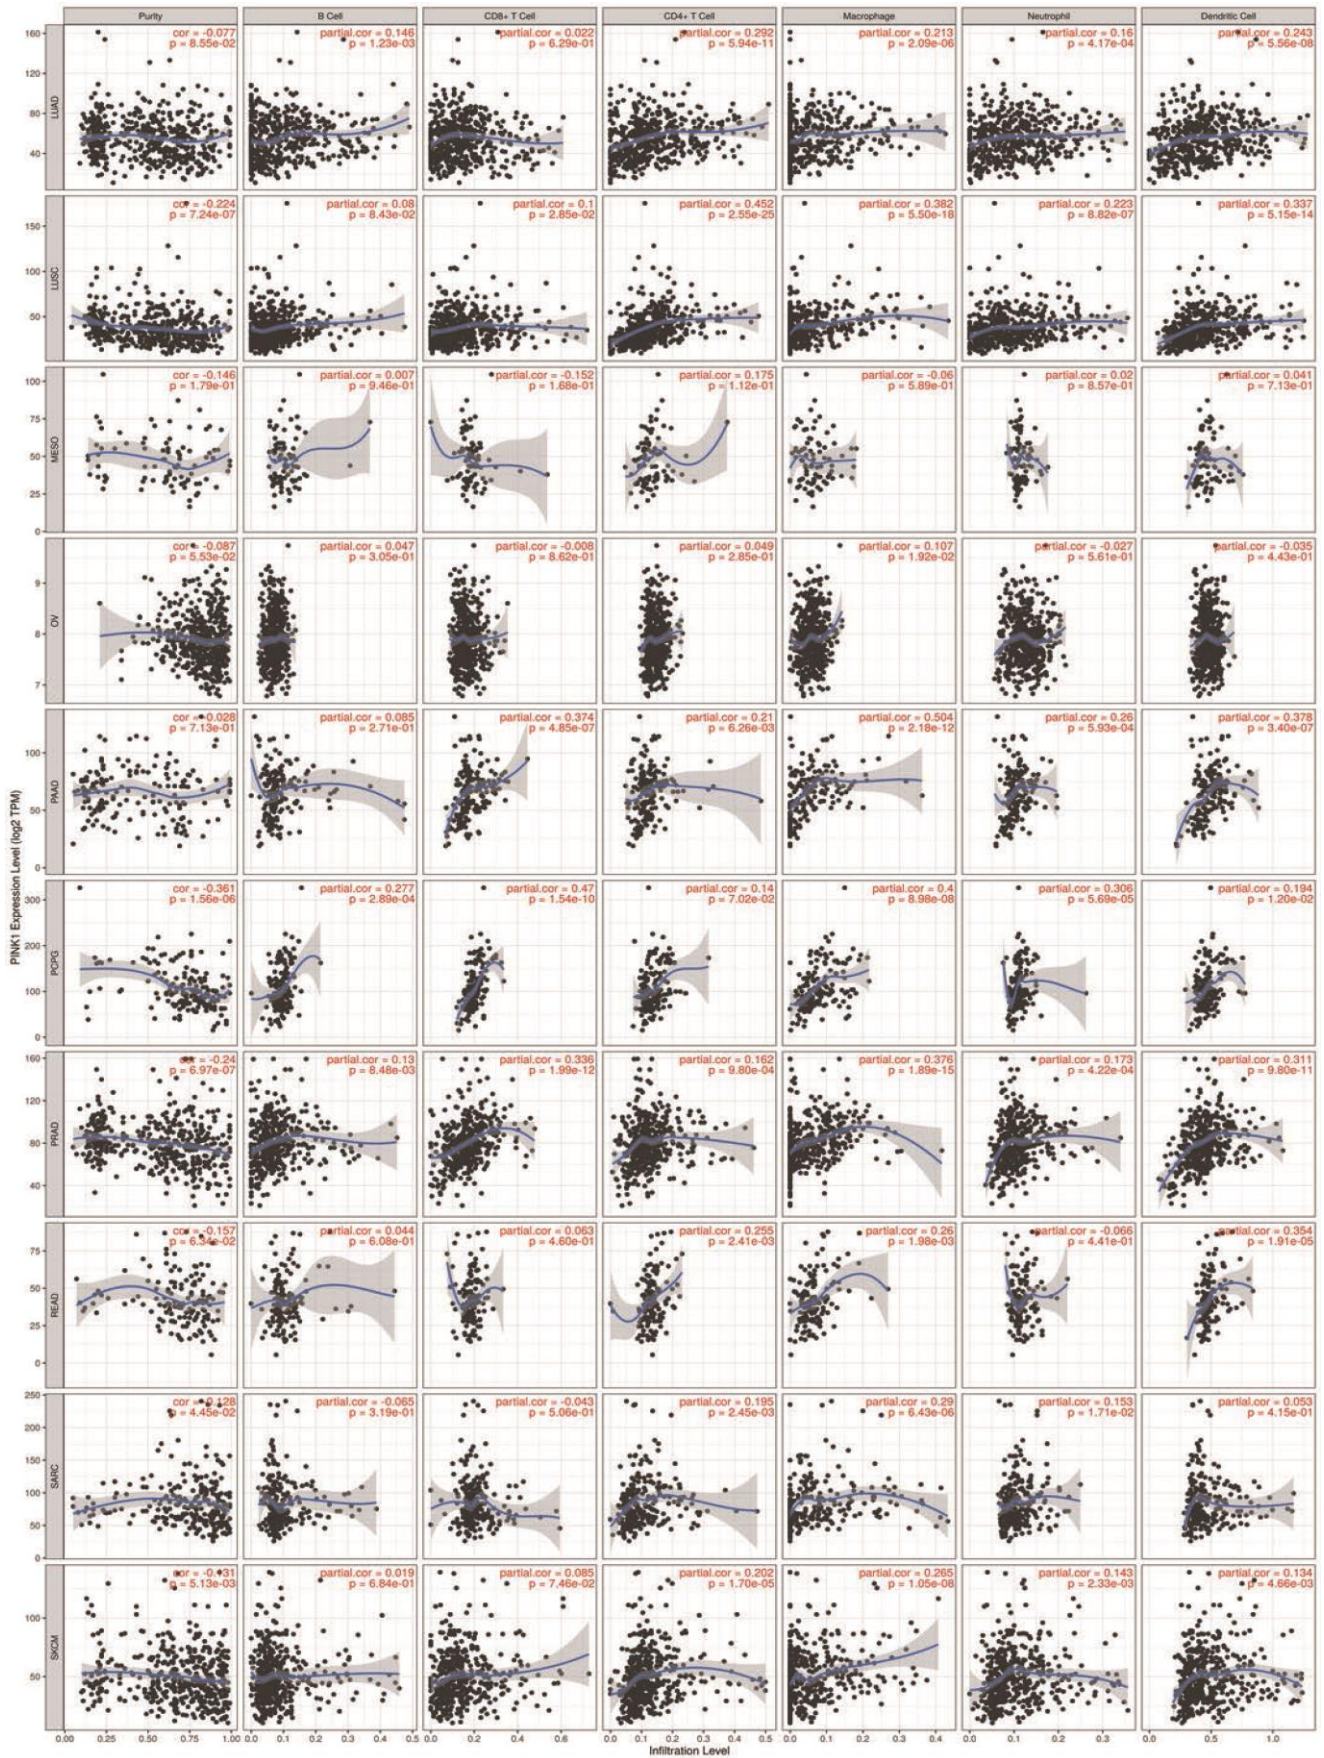

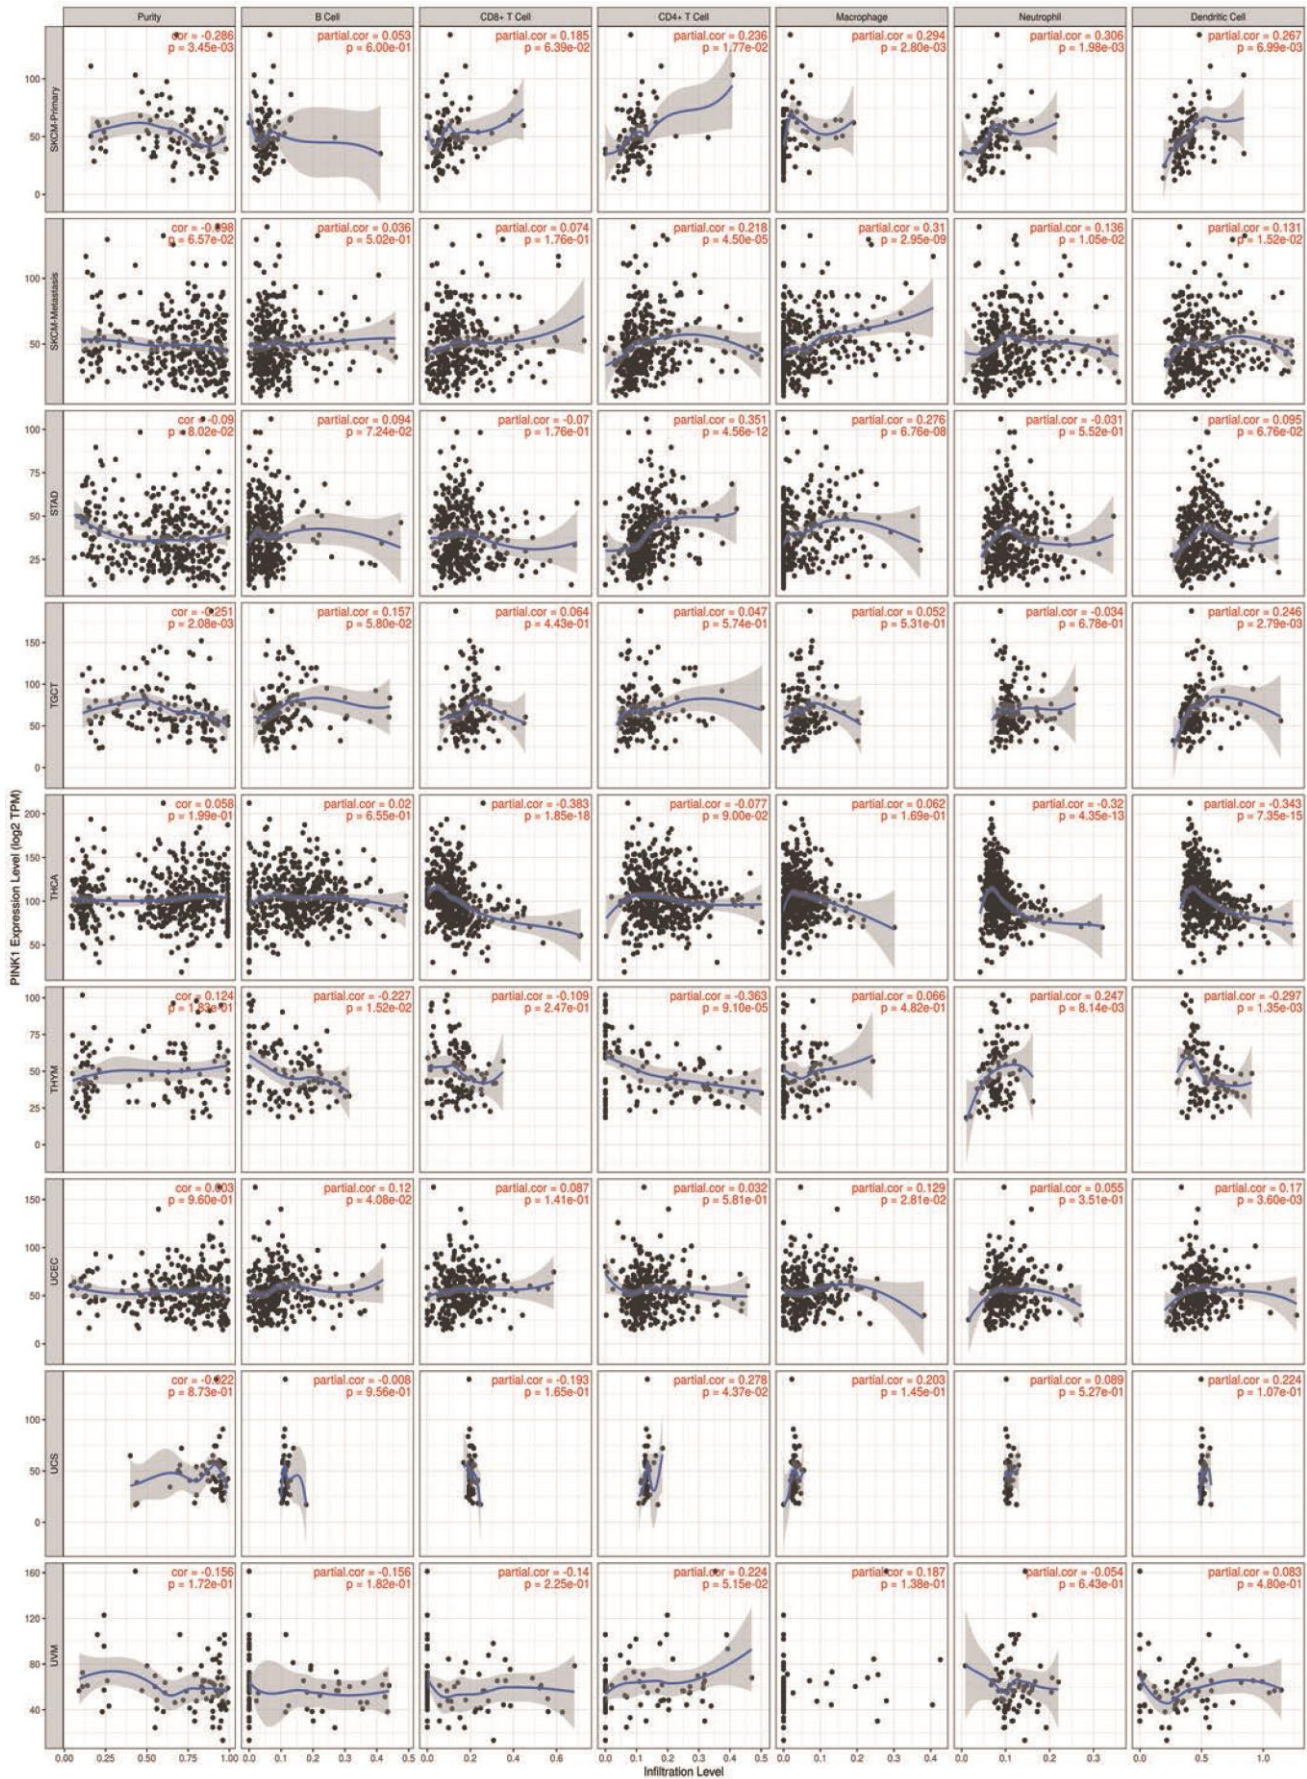

**Supplementary Figure 3.** The correlation between PINK1 expression and immune infiltration level in pan-cancer based on TIMER database. Abbreviations: ACC, adrenocortical carcinoma; BLCA, bladder urothelial carcinoma; BRCA, breast invasive carcinoma; BRCA-Basal, breast invasive carcinoma-basal; BRCA-Luminal, breast invasive carcinoma-luminal; BRCA-Her2, breast invasive carcinoma-her2; CESC, cervical and endocervical cancer; CHOL, cholangiocarcinoma; COAD, colon adenocarcinoma; DLBC, diffuse large B-cell lymphoma; ESCA, esophageal carcinoma; GBM, glioblastoma multiforme; HNSC, head and neck cancer; HNSC-HPVpos, head and neck cancer-HPV positive; HNSC-HPVneg, head and neck cancer-HPV negative; KICH, kidney chromophobe; KIRC, kidney renal clear cell carcinoma; KIRP, kidney renal papillary cell carcinoma; LGG, lower grade glioma; LIHC, liver hepatocellular carcinoma; LUAD, lung adenocarcinoma; LUSC, lung squamous cell carcinoma; MESO, mesothelioma; OV, ovarian serous cystadenocarcinoma; PAAD, pancreatic adenocarcinoma; PCPG, pheochromocytoma and paraganglioma; PRAD, prostate adenocarcinoma; READ, rectum adenocarcinoma; SARC, sarcoma; SKCM, skin cutaneous melanoma; SKCM-Primary, skin cutaneous melanoma-primary; SKCM-Metastasis, skin cutaneous melanoma-metastasis; STAD, stomach adenocarcinoma; TGCT, testicular germ cell tumors; THCA, thyroid carcinoma; THYM, thymoma; UCEC, uterine corpus endometrial carcinoma; UCS, uterine carcinosarcoma; UVM, uveal melanoma.

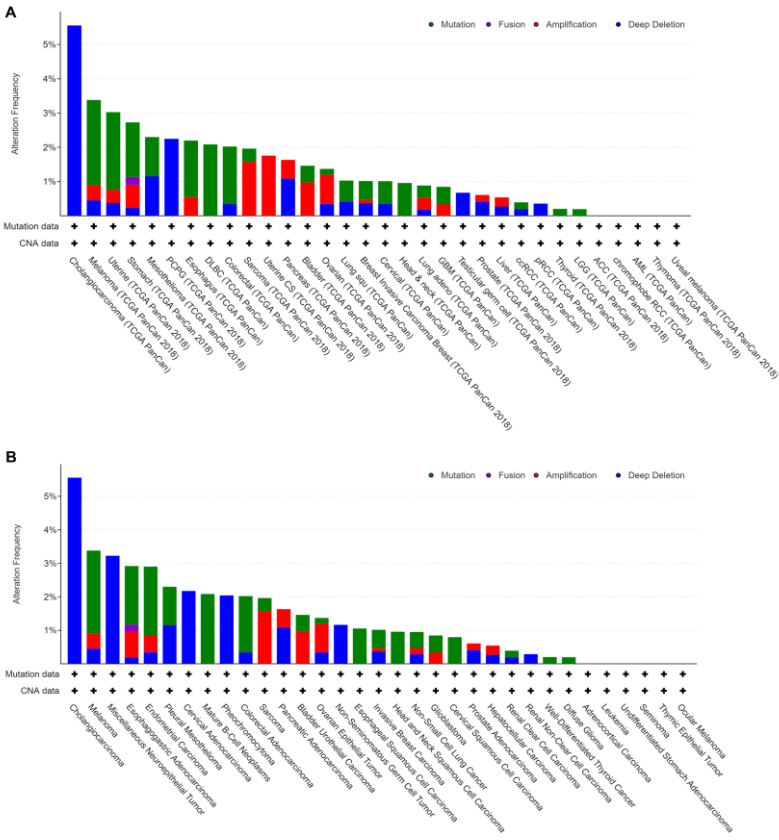

**Supplementary Figure 4.** The frequency of PINK1 alterations in pan-cancer. (A) according to cancer studies. (B) according to cancer types.

1.2 Supplementary Tables

**Supplementary Table 1. Survival analyses of PINK1 expression in pan-cancer (in Kaplan-Meier plotter)**

| Cancer type                           | Survival outcome | HR   | 95%CI      | P-value |
|---------------------------------------|------------------|------|------------|---------|
| Bladder carcinoma                     | OS               | 0.85 | 0.63-1.16  | 0.31    |
|                                       | RFS              | 0.73 | 0.36-1.48  | 0.38    |
| Breast cancer                         | OS               | 0.75 | 0.54-1.05  | 0.094   |
|                                       | RFS              | 0.68 | 0.44-1.06  | 0.085   |
| Cervical squamous cell carcinoma      | OS               | 1.61 | 0.97-2.66  | 0.064   |
|                                       | RFS              | 1.81 | 0.82-4     | 0.14    |
| Esophageal adenocarcinoma             | OS               | 0.38 | 0.15-0.99  | 0.039   |
|                                       | RFS              | 4.27 | 0.59-31.05 | 0.12    |
| Esophageal squamous cell carcinoma    | OS               | 0.46 | 0.2-1.07   | 0.063   |
|                                       | RFS              | 1.33 | 0.51-3.45  | 0.56    |
| Head-neck squamous cell carcinoma     | OS               | 0.66 | 0.49-0.90  | 0.0072  |
|                                       | RFS              | 0.63 | 0.3-1.33   | 0.22    |
| Kidney renal clear cell carcinoma     | OS               | 0.75 | 0.56-1.01  | 0.061   |
|                                       | RFS              | 4.93 | 0.65-37.65 | 0.088   |
| Kidney renal papillary cell carcinoma | OS               | 1.5  | 0.81-2.78  | 0.19    |
|                                       | RFS              | 3.49 | 1.05-11.61 | 0.03    |
| Liver hepatocellular carcinoma        | OS               | 0.5  | 0.35-0.71  | 8.7e-05 |
|                                       | RFS              | 0.62 | 0.44-0.86  | 0.0039  |
| Lung adenocarcinoma                   | OS               | 0.84 | 0.59-1.18  | 0.32    |
|                                       | RFS              | 1.26 | 0.77-2.04  | 0.35    |
| Lung squamous cell carcinoma          | OS               | 1.31 | 0.99-1.72  | 0.057   |
|                                       | RFS              | 1.41 | 0.84-2.36  | 0.19    |
| Ovarian cancer                        | OS               | 0.75 | 0.55-1.03  | 0.072   |
|                                       | RFS              | 0.61 | 0.4-0.94   | 0.022   |
| Pancreatic ductal adenocarcinoma      | OS               | 0.58 | 0.35-0.95  | 0.03    |
|                                       | RFS              | 2.56 | 0.95-6.88  | 0.056   |
| Rectum adenocarcinoma                 | OS               | 1.31 | 0.57-2.98  | 0.52    |
|                                       | RFS              | 3.61 | 0.41-31.96 | 0.22    |
| Sarcoma                               | OS               | 1.24 | 0.83-1.85  | 0.3     |
|                                       | RFS              | 1.58 | 0.85-2.96  | 0.15    |
| Stomach adenocarcinoma                | OS               | 1.31 | 0.94-1.83  | 0.11    |
|                                       | RFS              | 1.52 | 0.67-3.46  | 0.32    |
| Testicular germ cell tumor            | OS               | 0.27 | 0.03-2.72  | 0.24    |
|                                       | RFS              | 0.34 | 0.15-0.82  | 0.011   |
| Thyroid carcinoma                     | OS               | 2.7  | 1-7.28     | 0.041   |
|                                       | RFS              | 0.72 | 0.31-1.66  | 0.44    |
| Uterine corpus endometrial carcinoma  | OS               | 2.34 | 1.54-3.57  | 4.7e-05 |
|                                       | RFS              | 1.74 | 1-3.02     | 0.046   |

Abbreviations: HR, hazard ratio; CI, confidence interval; OS, overall survival; RFS, relapse free survival.

**Supplementary Table 2. Survival analyses of PINK1 expression in pan-cancer (in GEPIA).**



| Cancer type                                                             | Survival outcome | N    | HR   | P-value |
|-------------------------------------------------------------------------|------------------|------|------|---------|
| Total cancer                                                            | OS               | 9500 | 0.69 | 0       |
|                                                                         | DFS              | 9500 | 0.82 | 1.4e-07 |
| Adrenocortical carcinoma (ACC)                                          | OS               | 76   | 0.36 | 0.011   |
|                                                                         | DFS              | 76   | 0.7  | 0.3     |
| Bladder Urothelial Carcinoma (BLCA)                                     | OS               | 402  | 1    | 0.85    |
|                                                                         | DFS              | 402  | 1.1  | 0.63    |
| Breast invasive carcinoma (BRCA)                                        | OS               | 1070 | 1.2  | 0.2     |
|                                                                         | DFS              | 1070 | 0.97 | 0.89    |
| Cervical squamous cell carcinoma and endocervical adenocarcinoma (CESC) | OS               | 292  | 0.83 | 0.43    |
|                                                                         | DFS              | 292  | 0.82 | 0.49    |
| Cholangio carcinoma (CHOL)                                              | OS               | 36   | 2.5  | 0.052   |
|                                                                         | DFS              | 36   | 1.7  | 0.23    |
| Colon adenocarcinoma (COAD)                                             | OS               | 270  | 0.84 | 0.47    |
|                                                                         | DFS              | 270  | 0.84 | 0.49    |
| Lymphoid Neoplasm Diffuse Large B-cell Lymphoma (DLBC)                  | OS               | 46   | 0.38 | 0.18    |
|                                                                         | DFS              | 46   | 0.17 | 0.013   |
| Esophageal carcinoma (ESCA)                                             | OS               | 182  | 0.97 | 0.88    |
|                                                                         | DFS              | 182  | 1.6  | 0.058   |
| Glioblastoma multiforme (GBM)                                           | OS               | 162  | 1.2  | 0.3     |
|                                                                         | DFS              | 162  | 0.87 | 0.54    |
| Head and Neck squamous cell carcinoma (HNSC)                            | OS               | 518  | 1.3  | 0.037   |
|                                                                         | DFS              | 518  | 1.4  | 0.033   |
| Kidney Chromophobe (KICH)                                               | OS               | 64   | 1.5  | 0.53    |
|                                                                         | DFS              | 64   | 0.76 | 0.67    |
| Kidney renal clear cell carcinoma (KIRC)                                | OS               | 516  | 0.46 | 7.5e-07 |
|                                                                         | DFS              | 516  | 0.67 | 0.03    |
| Kidney renal papillary cell carcinoma (KIRP)                            | OS               | 282  | 0.46 | 0.015   |
|                                                                         | DFS              | 282  | 0.52 | 0.029   |
| Acute Myeloid Leukemia (LAML)                                           | OS               | 106  | 1.1  | 0.69    |
|                                                                         | DFS              | 106  | 1    | 1       |
| Brain Lower Grade Glioma (LGG)                                          | OS               | 514  | 1    | 0.99    |
|                                                                         | DFS              | 514  | 1.2  | 0.16    |
| Liver hepatocellular carcinoma (LIHC)                                   | OS               | 364  | 0.94 | 0.74    |
|                                                                         | DFS              | 364  | 0.75 | 0.057   |
| Lung adenocarcinoma (LUAD)                                              | OS               | 478  | 1    | 0.96    |
|                                                                         | DFS              | 478  | 0.79 | 0.13    |
| Lung squamous cell carcinoma (LUSC)                                     | OS               | 482  | 1.4  | 0.0099  |
|                                                                         | DFS              | 482  | 1.7  | 0.004   |
| Mesothelioma (MESO)                                                     | OS               | 82   | 0.61 | 0.043   |
|                                                                         | DFS              | 82   | 0.74 | 0.3     |
| Ovarian serous cystadenocarcinoma (OV)                                  | OS               | 424  | 1.2  | 0.26    |
|                                                                         | DFS              | 424  | 1    | 0.79    |
| Pancreatic adenocarcinoma (PAAD)                                        | OS               | 178  | 0.84 | 0.4     |
|                                                                         | DFS              | 178  | 0.85 | 0.47    |
| Pheochromocytoma and Paraganglioma (PCPG)                               | OS               | 182  | 0.22 | 0.13    |
|                                                                         | DFS              | 182  | 1.2  | 0.7     |
| Prostate adenocarcinoma (PRAD)                                          | OS               | 492  | 0.94 | 0.92    |
|                                                                         | DFS              | 492  | 1    | 0.99    |
| Rectum adenocarcinoma (READ)                                            | OS               | 92   | 2.1  | 0.13    |
|                                                                         | DFS              | 92   | 1.8  | 0.22    |
| Sarcoma (SARC)                                                          | OS               | 262  | 1.1  | 0.77    |
|                                                                         | DFS              | 262  | 0.87 | 0.44    |
| Skin Cutaneous Melanoma (SKCM)                                          | OS               | 458  | 1.1  | 0.32    |

Supplementary Material

|                                             |     |     |      |      |
|---------------------------------------------|-----|-----|------|------|
| Stomach adenocarcinoma (STAD)               | DFS | 458 | 0.98 | 0.88 |
|                                             | OS  | 384 | 1    | 0.77 |
| Testicular Germ Cell Tumors (TGCT)          | DFS | 384 | 1.3  | 0.24 |
|                                             | OS  | 136 | 0.36 | 0.35 |
| Thyroid carcinoma (THCA)                    | DFS | 136 | 1.2  | 0.61 |
|                                             | OS  | 509 | 1.1  | 0.91 |
| Thymoma (THYM)                              | DFS | 509 | 0.66 | 0.16 |
|                                             | OS  | 118 | 0.63 | 0.53 |
| Uterine Corpus Endometrial Carcinoma (UCEC) | DFS | 118 | 0.57 | 0.22 |
|                                             | OS  | 172 | 0.61 | 0.17 |
| Uterine Carcinosarcoma (UCS)                | DFS | 172 | 1.1  | 0.74 |
|                                             | OS  | 56  | 0.94 | 0.84 |
| Uveal Melanoma (UVM)                        | DFS | 56  | 0.56 | 0.11 |
|                                             | OS  | 78  | 1.2  | 0.66 |
|                                             | DFS | 78  | 1.2  | 0.71 |

Abbreviations: HR, hazard ratio; CI, confidence interval; OS, overall survival; DFS, disease free survival.
